# Supplementary material for: Atmospheric Degradation of Cyclic Volatile Methyl Siloxanes: Radical Chemistry and Oxidation Products
Source: PubMed Central journal article supplement — ACS Environ Au. 2022 Feb 17;2(3):263–74. doi: 10.1021/acsenvironau.1c00043 (PMC10114625; doi:10.1021/acsenvironau.1c00043), 2022-02-17
Supplement: vg1c00043_si_001.pdf [file vg1c00043_si_001.pdf]

Supporting information for:

Atmospheric degradation of cyclic volatile methyl siloxanes: Radical chemistry and oxidation products

*Mitchell W. Alton*<sup>1,2</sup> and *Eleanor C. Browne*\*<sup>1,2</sup>

<sup>1</sup>Department of Chemistry, University of Colorado, Boulder, Colorado, 80309, United States

<sup>2</sup>Cooperative Institute for Research in Environmental Sciences, University of Colorado, Boulder, Colorado, 80309, United States

**Corresponding author:**

Eleanor C. Browne, Department of Chemistry, University of Colorado, Boulder, Colorado 80309, United States and Cooperative Institute for Research in Environmental Sciences, University of Colorado, Boulder, Colorado 80309, United States; [orcid.org/0000-0002-8076-9455](https://orcid.org/0000-0002-8076-9455); Phone: 303-735- 7685; Email: [Eleanor.Browne@Colorado.edu](mailto:Eleanor.Browne@Colorado.edu)

This file includes:

13 Pages

Figures S1-S5

Tables S1-S6

References

## 1. Peak-fitting of HR-CIMS data

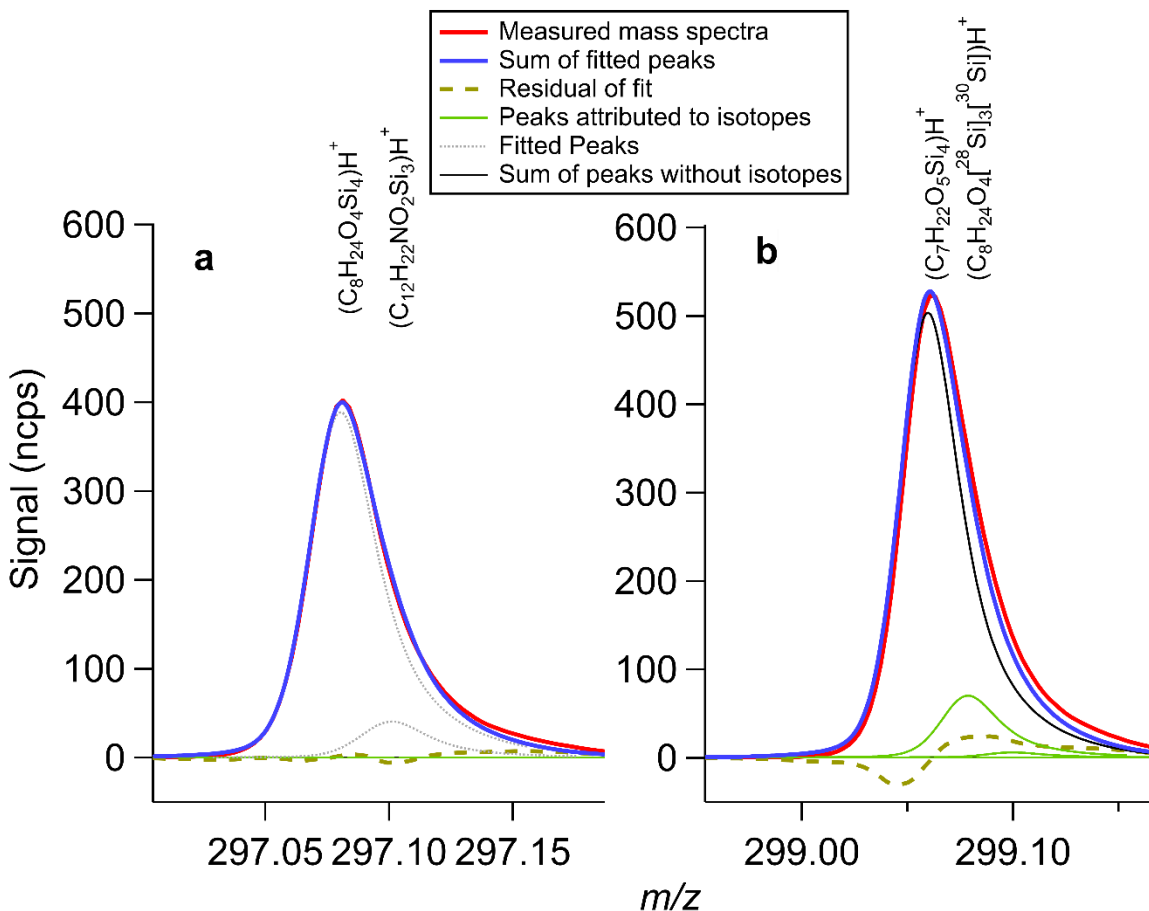

**Figure S1** Example of the peak fitting and isotopic allocations for (a) D4 and (b) siloxanol product which overlaps with the D4 isotope signal, performed in Tofware. Isotopes and fitted peaks are labeled with their formulas.

All analysis of the chemical ionization mass spectrometer data was performed in Tofware v3.2.3 within the IgorPro v8.0.4.2 environment. As there is no separation technique of the oxidation products before entering the mass spectrometer, we need to consider potential overlap from the stable isotopes of the parent species with their oxidation products. For instance, an isotope of D4,  $C_8H_{24}O_4[^{28}Si]_2[^{29}Si]_2$  (298.074 amu) and the siloxanol  $C_7H_{22}O_5[^{28}Si]_4$  (298.054 amu) are only different by 0.02 amu (not shown in Figure S1). The mass spectrometer has a resolving power of  $\sim 8000 \Delta m/z/m/z$ . While this is insufficient for baseline resolution between peaks of interest at the same nominal mass, once we define the shapes of the peaks in Tofware, we can use fully

constrained peak fitting after subtracting constrained isotopic signal to best fit the peaks corresponding to different ions, even if they are significantly overlapping.

## 2. KinSim mechanism and kinetic inputs

The KinSim cases in IGOR Pro format used in this publication are available upon request. The model simulated ambient conditions (860 mbar and 25°C). The reactions and rate constants for the inorganic reactions are in Table S1, the rate constants for oxidation with OH and Cl in addition to reactions with NO and HO<sub>2</sub> are in Table S2. The different isomerization reactions are listed in Table S3 and the reactions used to calculate wall partitioning are in Table S4. Explanations of the names are in Table S5.

**Table S1** Non-cVMS reactions used in the KinSim mechanism

| Reactant 1 | Reactant 2 | Product 1 | Product 2 | Product 3 | <i>k</i>              |
|------------|------------|-----------|-----------|-----------|-----------------------|
| H2O2       | hv         | OH        | OH        |           | $7.0 \times 10^{-5}$  |
| Cl2        | hv         | Cl        | Cl        |           | $2.0 \times 10^{-4}$  |
| HONO       | hv         | OH        | NO        |           | $3.0 \times 10^{-4}$  |
| O3         | hv         | O1D       | O2        |           | $5.0 \times 10^{-5}$  |
| NO2        | hv         | NO        | O1D       |           | $3.0 \times 10^{-7}$  |
| HO2        | hv         | OH        | O1D       |           | $1.0 \times 10^{-9}$  |
| O1D        | H2O        | OH        | OH        |           | $2.0 \times 10^{-10}$ |
| O1D        | N2         | O3P       | N2        |           | $2.6 \times 10^{-11}$ |
| OH         | H2O2       | HO2       | H2O       |           | $1.7 \times 10^{-12}$ |
| OH         | NO         | HNO2      |           |           | $3.3 \times 10^{-11}$ |
| OH         | HNO3       | H2O       | NO2       |           | $1.5 \times 10^{-13}$ |
| HO2        | NO2        | HNO4      |           |           | $4.7 \times 10^{-12}$ |
| NO2        | NO3        | N2O5      |           |           | $1.9 \times 10^{-12}$ |
| N2O5       |            | NO2       | NO3       |           | $7.0 \times 10^{-2}$  |
| O3P        | O2         | O3        |           |           | $2.8 \times 10^{-12}$ |
| O3P        | NO         | NO2       |           |           | $3.0 \times 10^{-11}$ |
| CH2O       | Cl         | HO2       | CO        |           | $7.3 \times 10^{-11}$ |
| CO         | OH         | CO2       | H         |           | $1.5 \times 10^{-13}$ |
| CO         | O1D        | CO2       |           |           | $8.0 \times 10^{-11}$ |
| H          | OH         | H2O       |           |           | $2.5 \times 10^{-10}$ |
| H          | Cl         | HCl       |           |           | $2.5 \times 10^{-10}$ |
| CO         | HO2        | CO2       | OH        |           | $1.0 \times 10^{-17}$ |
| Cl         | HO2        | O2        | HCl       |           | $3.4 \times 10^{-11}$ |
| OH         | HO2        | H2O       | O2        |           | $1.1 \times 10^{-10}$ |
| Cl         | CO         | Sink      |           |           | $1.0 \times 10^{-33}$ |
| HO2        | HO2        | H2O2      | O2        |           | $4.0 \times 10^{-12}$ |
| O3         | OH         | HO2       |           |           | $7.3 \times 10^{-14}$ |
| HO2        | O3         | OH        |           |           | $2.0 \times 10^{-15}$ |

|      |        |         |       |    |                       |
|------|--------|---------|-------|----|-----------------------|
| O1D  | O2     | O3P     | O2    |    | $4.0 \times 10^{-11}$ |
| O1D  | O3     | 2 O2    |       |    | $1.2 \times 10^{-10}$ |
| O1D  | O3     | O2      | 2 O1D |    | $1.2 \times 10^{-10}$ |
| O1D  | OH     | O2      | H     |    | $4.0 \times 10^{-11}$ |
| O1D  | HO2    | OH      | O2    |    | $5.9 \times 10^{-11}$ |
| O1D  | H2O2   | OH      | HO2   |    | $1.7 \times 10^{-15}$ |
| O1D  | O3     | 2 O2    |       |    | $8.0 \times 10^{-15}$ |
| H    | O3     | OH      | O2    |    | $2.9 \times 10^{-11}$ |
| HO2  | NO     | OH      | NO2   |    | $8.7 \times 10^{-12}$ |
| HO2  | H      | 2 OH    |       |    | $7.2 \times 10^{-11}$ |
| H    | HO2    | O1D     | H2O   |    | $1.6 \times 10^{-12}$ |
| H    | HO2    | O2      | H2    |    | $6.9 \times 10^{-12}$ |
| OH   | H2     | H2O     | H     |    | $6.7 \times 10^{-15}$ |
| OH   | OH     | H2O     | O1D   |    | $1.8 \times 10^{-12}$ |
| O1D  | NO2    | NO      | O2    |    | $1.0 \times 10^{-11}$ |
| O1D  | NO2    | NO3     |       |    | $2.0 \times 10^{-11}$ |
| O1D  | HO2NO2 | NO2     | H2O   | O2 | $8.6 \times 10^{-16}$ |
| H    | NO2    | OH      | NO    |    | $1.3 \times 10^{-10}$ |
| OH   | NO3    | HO2     | NO2   |    | $2.2 \times 10^{-11}$ |
| HO2  | NO3    | OH      | NO2   | O2 | $3.5 \times 10^{-12}$ |
| NO   | NO3    | NO2     | NO2   |    | $2.6 \times 10^{-11}$ |
| NO3  | NO3    | 2 NO2   | O2    |    | $2.3 \times 10^{-16}$ |
| HNO4 |        | HO2     | NO2   |    | $2.5 \times 10^{-1}$  |
| N2O5 | H2O    | 2 H2NO3 |       |    | $2.0 \times 10^{-21}$ |
| NO   | O3     | NO2     | O2    |    | $1.9 \times 10^{-14}$ |
| NO2  | O3     | NO3     | O2    |    | $3.2 \times 10^{-17}$ |
| NO2  | OH     | HO2     | NO    |    | $3.8 \times 10^{-16}$ |
| OH   | HNO4   | NO2     |       |    | $4.7 \times 10^{-12}$ |
| H    | O2     | HO2     |       |    | $6.0 \times 10^{-32}$ |
| H    | O2     | OH      | O1D   |    | $1.5 \times 10^{-37}$ |
| CH2O | OH     | HO2     | CO    |    | $9.4 \times 10^{-12}$ |
| CO   | OH     | CO2     | HO2   |    | $1.5 \times 10^{-13}$ |

**Table S2** Bimolecular reactions of Si-containing products.

| Reactant 1           | Reactant 2 | Product 1         | Product 2 | Product 3    | $k$                   |
|----------------------|------------|-------------------|-----------|--------------|-----------------------|
| D3 <sup>a</sup>      | OH         | D3CH2OO           | H2O       |              | $8.6 \times 10^{-13}$ |
| D3                   | Cl         | D3CH2OO           | HCl       |              | $5.6 \times 10^{-11}$ |
| D4                   | OH         | D4CH2OO           | H2O       |              | $1.3 \times 10^{-12}$ |
| D4                   | Cl         | D4CH2OO           | HCl       |              | $1.2 \times 10^{-10}$ |
| D5                   | OH         | D5CH2OO           | H2O       |              | $2.1 \times 10^{-12}$ |
| D5                   | Cl         | D5CH2OO           | HCl       |              | $1.8 \times 10^{-10}$ |
| D3OH                 | OH         | D3OHCH2OO         | H2O       |              | $8.6 \times 10^{-13}$ |
| D3OH                 | Cl         | D3OHCH2OO         | HCl       |              | $5.6 \times 10^{-11}$ |
| D4OH                 | OH         | D4OHCH2OO         | H2O       |              | $1.3 \times 10^{-12}$ |
| D4OH                 | Cl         | D4OHCH2OO         | HCl       |              | $1.2 \times 10^{-10}$ |
| D5OH                 | OH         | D5OHCH2OO         | H2O       |              | $2.1 \times 10^{-12}$ |
| D5OH                 | Cl         | D5OHCH2OO         | HCl       |              | $1.8 \times 10^{-10}$ |
| D3FormEst            | OH         | D3FormEstCH2OO    | H2O       |              | $8.6 \times 10^{-13}$ |
| D3FormEst            | Cl         | D3FormEstCH2OO    | HCl       |              | $5.6 \times 10^{-11}$ |
| D4FormEst            | OH         | D4FormEstCH2OO    | H2O       |              | $1.3 \times 10^{-12}$ |
| D4FormEst            | Cl         | D4FormEstCH2OO    | HCl       |              | $1.2 \times 10^{-10}$ |
| D5FormEst            | OH         | D5FormEstCH2OO    | H2O       |              | $2.1 \times 10^{-12}$ |
| D5FormEst            | Cl         | D5FormEstCH2OO    | HCl       |              | $1.8 \times 10^{-10}$ |
| D3(OH)2              | OH         | Sink <sup>b</sup> | H2O       |              | $8.6 \times 10^{-13}$ |
| D3(OH)2              | Cl         | Sink              | HCl       |              | $5.6 \times 10^{-11}$ |
| D4(OH)2              | OH         | Sink              | H2O       |              | $1.3 \times 10^{-12}$ |
| D4(OH)2              | Cl         | Sink              | HCl       |              | $1.2 \times 10^{-10}$ |
| D5(OH)2              | OH         | Sink              | H2O       |              | $2.1 \times 10^{-12}$ |
| D5(OH)2              | Cl         | Sink              | HCl       |              | $1.8 \times 10^{-10}$ |
| D3(FormEst)2         | OH         | Sink              | H2O       |              | $8.6 \times 10^{-13}$ |
| D3(FormEst)2         | Cl         | Sink              | HCl       |              | $5.6 \times 10^{-11}$ |
| D4(FormEst)2         | OH         | Sink              | H2O       |              | $1.3 \times 10^{-12}$ |
| D4(FormEst)2         | Cl         | Sink              | HCl       |              | $1.2 \times 10^{-10}$ |
| D5(FormEst)2         | OH         | Sink              | H2O       |              | $2.1 \times 10^{-12}$ |
| D5(FormEst)2         | Cl         | Sink              | HCl       |              | $1.8 \times 10^{-10}$ |
| D3OHFormEst          | OH         | Sink              | H2O       |              | $8.6 \times 10^{-13}$ |
| D3OHFormEst          | Cl         | Sink              | HCl       |              | $5.6 \times 10^{-11}$ |
| D4OHFormEst          | OH         | Sink              | H2O       |              | $1.3 \times 10^{-12}$ |
| D4OHFormEst          | Cl         | Sink              | HCl       |              | $1.2 \times 10^{-10}$ |
| D5OHFormEst          | OH         | Sink              | H2O       |              | $2.1 \times 10^{-12}$ |
| D5OHFormEst          | Cl         | Sink              | HCl       |              | $1.8 \times 10^{-10}$ |
| D3CH2OO <sup>c</sup> | HO2        | 0.9 D3CH2O        | 0.9 OH    | 0.1 D3CH2OOH | $1.7 \times 10^{-11}$ |
| D3CH2OO <sup>c</sup> | NO         | D3CH2O            | NO2       |              | $9.0 \times 10^{-12}$ |
| D3O <sup>d</sup>     | H2O        | D3OH              | OH        |              | $5.0 \times 10^{-15}$ |
| D3O                  | HO2        | D3OH              | O2        |              | $1.7 \times 10^{-11}$ |

<sup>a</sup>Reactions of the closed-shell oxidation products had the same rate constants as the parent cVMS. <sup>b</sup>Tas we were focused on the first-generation products, once a cVMA had two methyl groups replaced and was oxidized, it was no longer considered. <sup>c</sup>The rate constants and branching ratios of reactions between RO<sub>2</sub> with HO<sub>2</sub>, NO, and other RO<sub>2</sub> radicals was kept constant for all cVMS and their oxidation products. <sup>d</sup>The rate constant of reactions between RO and H<sub>2</sub>O as well as for the addition of O<sub>2</sub> to the alkyl radicals were also kept constant.

**Table S3** Unimolecular/pseudo-unimolecular reactions rate constants of Si-containing products.

| Reactant 1     | Product 1       | Product 2 | $k$                  |
|----------------|-----------------|-----------|----------------------|
| D3CH2OO        | D3O             | CH2O      | $8.0 \times 10^{-3}$ |
| D3CH2O         | D3OCH2          |           | $1.0 \times 10^{10}$ |
| D3OCH2O        | D3FormEst       | HO2       | $1.0 \times 10^4$    |
| D3OHO          | Sink            |           | $1.1 \times 10^3$    |
| D3OHCH2OO      | D3OHO           | CH2O      | $9.0 \times 10^{-1}$ |
| D3OHCH2O       | D3OHOCH2        |           | $1.0 \times 10^9$    |
| D3OHOCH2O      | D3OHFormEst     | HO2       | $1.0 \times 10^4$    |
| D3FormEstCH2OO | D3FormEstO      | CH2O      | $9.0 \times 10^{-1}$ |
| D3FormEstO     | Sink            |           | $1.1 \times 10^3$    |
| D3FormEstCH2O  | D3FormEstOCH2   |           | $1.0 \times 10^9$    |
| D3FormEstOCH2  | D3FormEstOCH2OO |           | $1.0 \times 10^{11}$ |
| D3FormEstOCH2O | D3FormEst2      | HO2       | $1.0 \times 10^4$    |
| D3O            | D3OHCH2OO       |           | $1.1 \times 10^3$    |
| D4CH2OO        | D4O             | CH2O      | $8.0 \times 10^{-3}$ |
| D4CH2O         | D4OCH2          |           | $1.0 \times 10^9$    |
| D4OCH2O        | D4FormEst       | HO2       | $1.0 \times 10^4$    |
| D4OHCH2OO      | D4OHO           | CH2O      | $9.0 \times 10^{-1}$ |
| D4OHO          | Sink            |           | $5.1 \times 10^3$    |
| D4OHCH2O       | D4OHOCH2        |           | $1.0 \times 10^9$    |
| D4OHOCH2O      | D4OHFormEst     | HO2       | $1.0 \times 10^4$    |
| D4FormEstCH2OO | D4FormEstO      | CH2O      | $9.0 \times 10^{-1}$ |
| D4FormEstO     | Sink            |           | $5.1 \times 10^3$    |
| D4FormEstCH2O  | D4FormEstOCH2   |           | $1.0 \times 10^9$    |
| D4FormEstOCH2O | D4FormEst2      | HO2       | $1.0 \times 10^4$    |
| D4O            | D4OHCH2OO       |           | $1.1 \times 10^3$    |
| D5CH2OO        | D5O             | CH2O      | $8.0 \times 10^{-3}$ |
| D5CH2O         | D5OCH2          |           | $1.0 \times 10^9$    |
| D5OCH2O        | D5FormEst       | HO2       | $1.0 \times 10^4$    |
| D5OHCH2OO      | D5OHO           | CH2O      | $9.0 \times 10^{-1}$ |
| D5OHO          | Sink            |           | $5.1 \times 10^3$    |
| D5OHCH2O       | D5OHOCH2        |           | $1.0 \times 10^9$    |
| D5OHOCH2       | D5OHOCH2OO      |           | $1.0 \times 10^{11}$ |
| D5FormEstO     | Sink            |           | $5.1 \times 10^3$    |
| D5FormEstCH2OO | D5FormEstO      | CH2O      | $9.0 \times 10^{-1}$ |
| D5FormEstCH2O  | D5FormEstOCH2   |           | $1.0 \times 10^9$    |
| D5FormEstOCH2O | D5FormEst2      | HO2       | $1.0 \times 10^4$    |
| D5O            | D5OHCH2OO       |           | $1.1 \times 10^3$    |

**Table S4** Inputs used to calculate wall partitioning in the model

| Reactant 1    | Product 1     | A Ainf             | E Einf             | N ninf             |
|---------------|---------------|--------------------|--------------------|--------------------|
| D3            | w_D3          | $4.39 \times 10^7$ | $4.00 \times 10^3$ | $1 \times 10^{-3}$ |
| w_D3          | D3            | $4.39 \times 10^7$ | 0                  | $1 \times 10^{-3}$ |
| D3FormEst     | w_D3FormEst   | $2.83 \times 10^7$ | $4.60 \times 10^3$ | $1 \times 10^{-3}$ |
| w_D3FormEst   | D3FormEst     | $2.83 \times 10^7$ | 0                  | $1 \times 10^{-3}$ |
| D3FormEst2    | w_D3FormEst2  | $1.27 \times 10^7$ | $4.83 \times 10^3$ | $1 \times 10^{-3}$ |
| w_D3FormEst2  | D3FormEst2    | $1.27 \times 10^7$ | 0                  | $1 \times 10^{-3}$ |
| D3OH          | w_D3OH        | $1.82 \times 10^6$ | $4.88 \times 10^3$ | $1 \times 10^{-3}$ |
| w_D3OH        | D3OH          | $1.82 \times 10^6$ | 0                  | $1 \times 10^{-3}$ |
| D3OH2         | w_D3OH2       | $8.20 \times 10^3$ | $5.64 \times 10^2$ | $1 \times 10^{-3}$ |
| w_D3OH2       | D3OH2         | $8.20 \times 10^3$ | 0                  | $1 \times 10^{-3}$ |
| D3OHFormEst   | w_D3OHFormEst | $6.05 \times 10^4$ | $5.40 \times 10^3$ | $1 \times 10^{-3}$ |
| w_D3OHFormEst | D3OHFormEst   | $6.05 \times 10^4$ | 0                  | $1 \times 10^{-3}$ |
| D3OCH2OOH     | w_D3OCH2OOH   | $8.41 \times 10^5$ | $5.26 \times 10^3$ | $1 \times 10^{-3}$ |
| w_D3OCH2OOH   | D3OCH2OOH     | $8.41 \times 10^5$ | 0                  | $1 \times 10^{-3}$ |
| D3CH2OOH      | w_D3CH2OOH    | $2.95 \times 10^6$ | $5.03 \times 10^3$ | $1 \times 10^{-3}$ |
| w_D3CH2OOH    | D3CH2OOH      | $2.95 \times 10^6$ | 0                  | $1 \times 10^{-3}$ |
| D4            | w_D4          | $2.10 \times 10^7$ | $4.52 \times 10^3$ | $1 \times 10^{-3}$ |
| w_D4          | D4            | $2.10 \times 10^7$ | 0                  | $1 \times 10^{-3}$ |
| D4FormEst     | w_D4FormEst   | $3.75 \times 10^6$ | $5.09 \times 10^3$ | $1 \times 10^{-3}$ |
| w_D4FormEst   | D4FormEst     | $3.75 \times 10^6$ | 0                  | $1 \times 10^{-3}$ |
| D4FormEst2    | w_D4FormEst2  | $2.16 \times 10^6$ | $5.29 \times 10^3$ | $1 \times 10^{-3}$ |
| w_D4FormEst2  | D4FormEst2    | $2.16 \times 10^6$ | 0                  | $1 \times 10^{-3}$ |
| D4OH          | w_D4OH        | $1.54 \times 10^5$ | $5.33 \times 10^3$ | $1 \times 10^{-3}$ |
| w_D4OH        | D4OH          | $1.54 \times 10^5$ | 0                  | $1 \times 10^{-3}$ |
| D4OH2         | w_D4OH2       | $9.08 \times 10^2$ | $6.02 \times 10^3$ | $1 \times 10^{-3}$ |
| w_D4OH2       | D4OH2         | $9.08 \times 10^2$ | 0                  | $1 \times 10^{-3}$ |
| D4OHFormEst   | w_D4OHFormEst | $7.16 \times 10^3$ | $5.81 \times 10^3$ | $1 \times 10^{-3}$ |
| w_D4OHFormEst | D4OHFormEst   | $7.16 \times 10^3$ | 0                  | $1 \times 10^{-3}$ |
| D4OCH2OOH     | w_D4OCH2OOH   | $1.35 \times 10^5$ | $5.68 \times 10^3$ | $1 \times 10^{-3}$ |
| w_D4OCH2OOH   | D4OCH2OOH     | $1.35 \times 10^5$ | 0                  | $1 \times 10^{-3}$ |
| D4CH2OOH      | w_D4CH2OOH    | $4.45 \times 10^5$ | $5.68 \times 10^3$ | $1 \times 10^{-3}$ |
| w_D4CH2OOH    | D4CH2OOH      | $4.45 \times 10^5$ | 0                  | $1 \times 10^{-3}$ |
| D5            | w_D5          | $4.86 \times 10^6$ | $4.96 \times 10^3$ | $1 \times 10^{-3}$ |
| w_D5          | D5            | $4.86 \times 10^6$ | 0                  | $1 \times 10^{-3}$ |
| D5FormEst     | w_D5FormEst   | $7.74 \times 10^5$ | $5.47 \times 10^3$ | $1 \times 10^{-3}$ |
| w_D5FormEst   | D5FormEst     | $7.74 \times 10^5$ | 0                  | $1 \times 10^{-3}$ |
| D5FormEst2    | w_D5FormEst2  | $4.80 \times 10^5$ | $5.66 \times 10^3$ | $1 \times 10^{-3}$ |
| w_D5FormEst2  | D5FormEst2    | $4.80 \times 10^5$ | 0                  | $1 \times 10^{-3}$ |
| D5OH          | w_D5OH        | $2.69 \times 10^4$ | $5.71 \times 10^3$ | $1 \times 10^{-3}$ |
| w_D5OH        | D5OH          | $2.69 \times 10^4$ | 0                  | $1 \times 10^{-3}$ |
| D5OH2         | w_D5OH2       | $1.94 \times 10^2$ | $6.33 \times 10^3$ | $1 \times 10^{-3}$ |
| w_D5OH2       | D5OH2         | $1.94 \times 10^2$ | 0                  | $1 \times 10^{-3}$ |
| D5OHFormEst   | w_D5OHFormEst | $1.13 \times 10^3$ | $6.14 \times 10^3$ | $1 \times 10^{-3}$ |
| w_D5OHFormEst | D5OHFormEst   | $1.13 \times 10^3$ | 0                  | $1 \times 10^{-3}$ |
| D5OCH2OOH     | w_D5OCH2OOH   | $2.95 \times 10^4$ | $6.02 \times 10^3$ | $1 \times 10^{-3}$ |
| w_D5OCH2OOH   | D5OCH2OOH     | $2.95 \times 10^4$ | 0                  | $1 \times 10^{-3}$ |
| D5CH2OOH      | w_D5CH2OOH    | $9.23 \times 10^4$ | $5.83 \times 10^3$ | $1 \times 10^{-3}$ |
| w_D5CH2OOH    | D5CH2OOH      | $9.23 \times 10^4$ | 0                  | $1 \times 10^{-3}$ |

**Table S5** Abbreviations and meanings used in KinSim (shown for D5, but applies to all cVMS)

| KinSim Name | Meaning                              |
|-------------|--------------------------------------|
| D5FormEst   | D5 Formate Ester                     |
| D5OH        | D5 Siloxanol                         |
| D5OH2       | D5 Siloxandiol                       |
| D5FormEst2  | D5 with Two Formate Ester Groups     |
| D5CH2OOH    | D5 Hydroperoxide                     |
| D5OCH2OOH   | D5 Ether Hydroperoxide               |
| D5OHCH2OO   | D5 Siloxanol with an RO <sub>2</sub> |

### 3. [<sup>2</sup>H]<sub>18</sub>L2 oxidation with Cl atoms

In an experiment that is similar to one performed by Atkinson (1995)<sup>1</sup>, fully deuterated hexamethyldisiloxane (D<sub>18</sub>L2, or [<sup>2</sup>H]<sub>18</sub>L2) was oxidized using Cl<sub>2</sub> as the oxidant precursor. The toluene used as the reagent ion was not isotopically labeled, so all charge-carrying species on the detected molecules will be <sup>1</sup>H. Trace water in the chamber was sufficient for labile hydrogen exchange. Figure S2 shows example time series of the products attributed to the siloxanol and the formate ester. The siloxanol has one

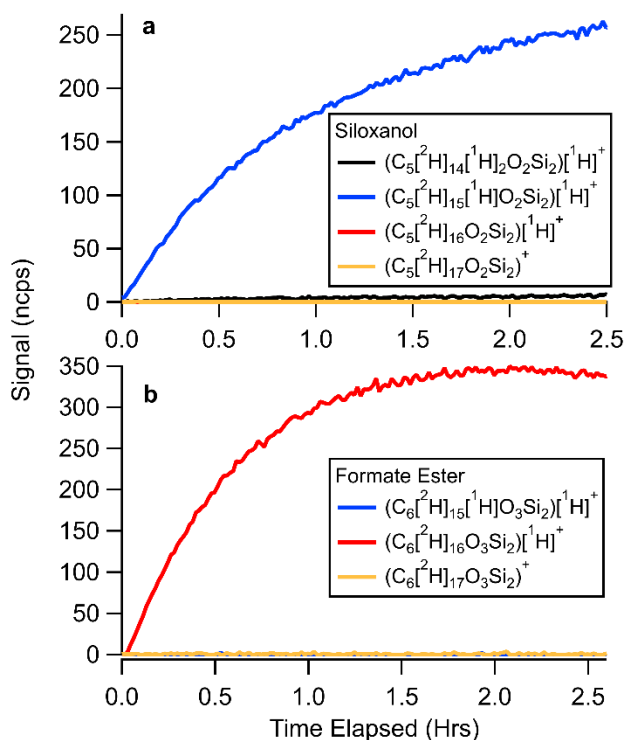**Figure S2** Time series of the signals

corresponding to the (a) siloxanol and (b) formate ester products of [<sup>2</sup>H]<sub>18</sub>L2. The trace colors are based on how many <sup>1</sup>H are present in the formula.



exchangeable H (aside from the charge carrying H) on the hydroxyl group. The other main product,  $(C_6[{}^2H]_{16}O_3Si_2)[{}^1H]^+$ , is only observed as the deuterated peak consistent with a formate ester rather than a carboxylic acid.

#### **4. Assumptions and evidence for capturing most of the oxidation products**

In Figure S4, the time-series of the sum of the products are shown versus the percentage of cVMS reacted. Although the total signals begin to diverge near the end of the experiments, at the point where 10% of the cVMS has been oxidized there is agreement within ~20% of the total product signal between the different conditions. As shown in Figure S3, the total signals vary minimally at the 10% cVMS reacted point between experiments, even when there are significant changes in the compositions of the ions formed (particularly for D3). Given the large changes in RO<sub>2</sub> fate between the different experimental conditions, we would expect to see larger deviations between experiments if we were failing to detect important oxidation products or if there were large variations in instrument response between the different compounds. Because of this, we expect that the different ions provide similar instrument responses to each other and that we are measuring most of the oxidation products.

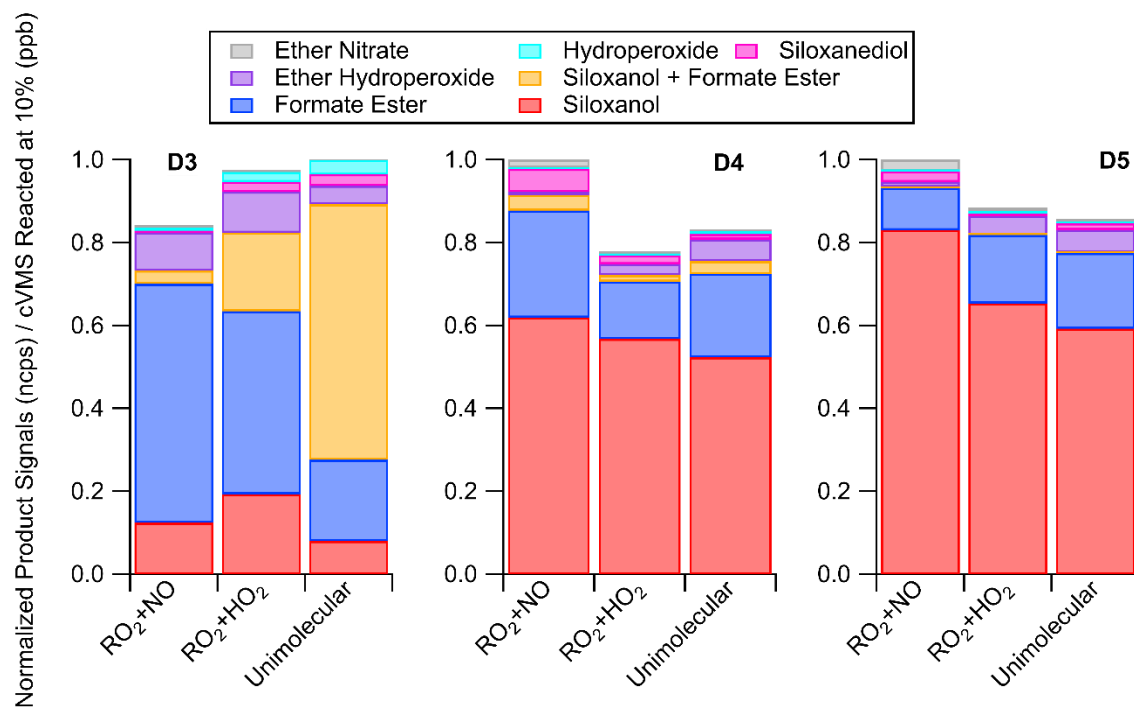

**Figure S3** Sum of the product signals for the three cVMS investigated in all three conditions at the point where 10% of the cVMS was oxidized, normalized to the condition with the largest signal yield, colored by the identity of the signals.

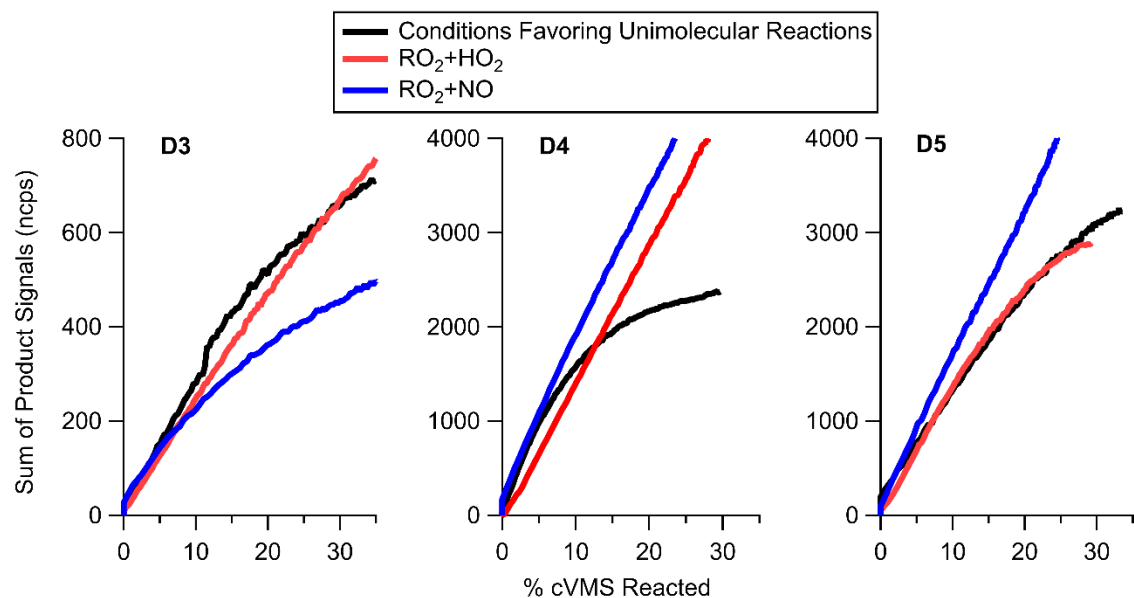

**Figure S4** Sum of the product signals for the three different cVMS used plotted versus the percent of the parent cVMS lost.

## 5. Siloxanol Time-Series from Model and experiments

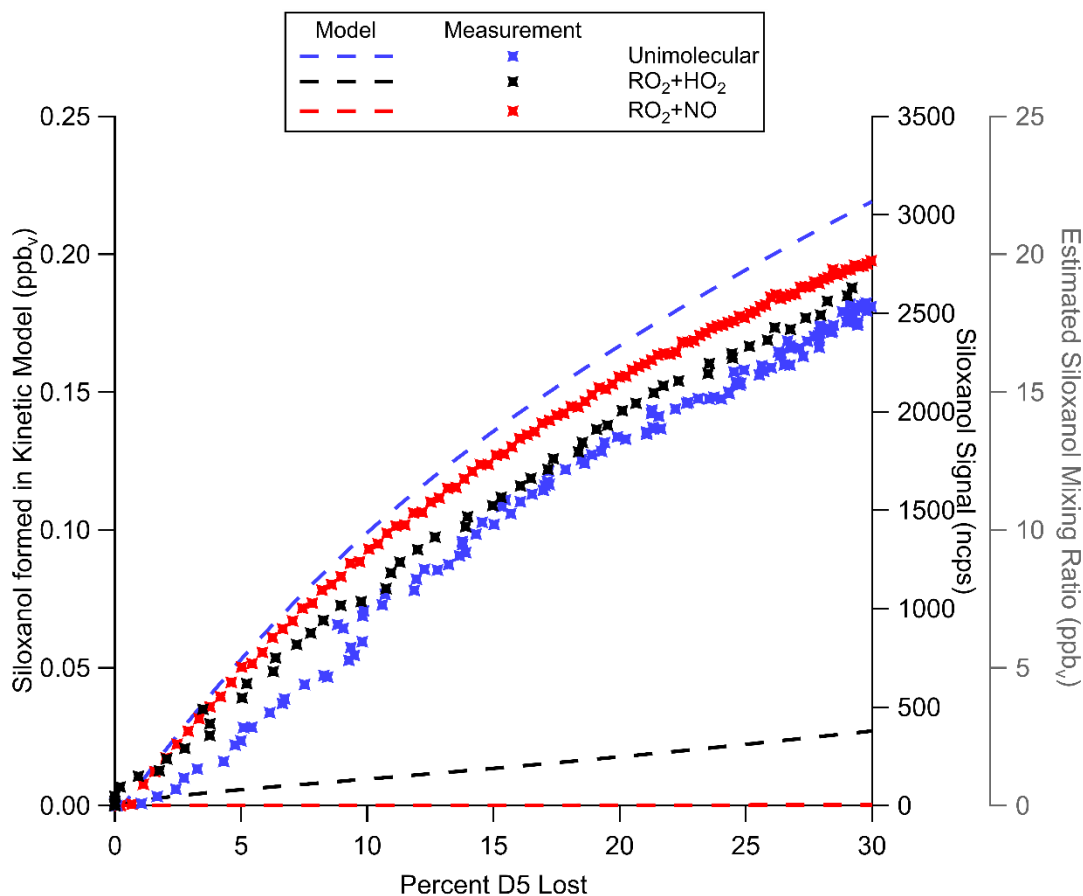

**Figure S5** Time series of the siloxanol signals for D5 oxidation in our experiments (markers) and our kinetic model (dashed lines) plotted versus the percent of cVMS lost.

## 6. Estimated physical constants of cVMS oxidation products

Since there are no measurements of Henry's law constants for the oxidation products, we used three different methods to estimate the constants for the proposed products. Using EPIWEB v4.11, the vapor pressures/boiling points (MPBPWIN v1.44), water solubilities (WSKOW v1.43), and Henry's law constants (HENRY v3.21) were all calculated. No inputs were added aside from the structure of the product. Using the Toxicity Estimation Software Tool (TEST v5.1.1), the vapor pressures and water solubilities were calculated with the consensus method.

As a proxy for Henry's law, the ratio of vapor pressure to water solubility was also used, which is also reported in HENRY v3.21 using the water solubility estimate from WSKOW v1.43 and vapor pressure estimate from MPBPWIN v1.44. It is important to note that vapor pressure divided by water solubility is not equivalent to the Henry's Law constant. However, we are using this as an approximation to Henry's Law to compare between TEST and EPIWEB outputs. Table S6 contains the results of the three different methods.

**Table S6:** Estimated physical parameters of cVMS oxidation products for D3, D4, and D5 using both EPIWEB and TEST software.

| Compound               | Vapor Pressure (mmHg) |                       | Water Solubility (log(mol L <sup>-1</sup> )) |       | Henry's Solubility (M atm <sup>-1</sup> ) | Vapor Pressure/Water Solubility (M atm <sup>-1</sup> ) |                       |
|------------------------|-----------------------|-----------------------|----------------------------------------------|-------|-------------------------------------------|--------------------------------------------------------|-----------------------|
|                        | MPBP                  | TEST                  | WSKOW                                        | TEST  | HENRYWin                                  | HENRYWin                                               | TEST                  |
| D3                     | 3.49×10 <sup>0</sup>  | 2.17×10 <sup>0</sup>  | -5.157                                       | -6.14 | 6.45×10 <sup>-4</sup>                     | 1.61×10 <sup>-3</sup>                                  | 2.54×10 <sup>-4</sup> |
| D3OH                   | 2.87×10 <sup>-1</sup> | 1.10×10 <sup>-1</sup> | -2.991                                       | -4.66 | 1.26×10 <sup>+1</sup>                     | 2.70×10 <sup>0</sup>                                   | 1.51×10 <sup>-1</sup> |
| D3 Formate Ester       | 1.87×10 <sup>0</sup>  | 9.81×10 <sup>-3</sup> | -4.096                                       | -5.64 | 2.82×10 <sup>-2</sup>                     | 3.26×10 <sup>-2</sup>                                  | 1.77×10 <sup>-1</sup> |
| D3OHFormEst            | 9.92×10 <sup>-3</sup> | 3.37×10 <sup>-2</sup> | -1.93                                        | -4.26 | 5.52×10 <sup>+2</sup>                     | 1.00×10 <sup>+3</sup>                                  | 1.24×10 <sup>0</sup>  |
| D3 Hydroperoxide       | 1.93×10 <sup>-1</sup> | 4.40×10 <sup>-1</sup> | -4.317                                       | -6.28 | 6.99×10 <sup>0</sup>                      | 1.90×10 <sup>-1</sup>                                  | 9.06×10 <sup>-4</sup> |
| D3 Organonitrate       | 1.33×10 <sup>-1</sup> | 1.69×10 <sup>-2</sup> | -5.536                                       | -6.65 | 2.40×10 <sup>-1</sup>                     | 1.66×10 <sup>-2</sup>                                  | 1.01×10 <sup>-2</sup> |
| D3 Ether hydroperoxide | 1.70×10 <sup>-1</sup> | 3.92×10 <sup>-2</sup> | -3.36                                        | -4.05 | 8.47×10 <sup>+1</sup>                     | 1.95×10 <sup>0</sup>                                   | 1.73×10 <sup>0</sup>  |
| D3 Ether Organonitrate | 1.17×10 <sup>-1</sup> | 4.27×10 <sup>-3</sup> | -4.579                                       | -6.11 | 2.92×10 <sup>0</sup>                      | 1.71×10 <sup>-1</sup>                                  | 1.38×10 <sup>-1</sup> |
| D3 Form Est 2          | 7.51×10 <sup>-1</sup> | 1.02×10 <sup>-3</sup> | -3.035                                       | -5.56 | 1.24×10 <sup>0</sup>                      | 9.34×10 <sup>-1</sup>                                  | 2.05×10 <sup>0</sup>  |
| D3OH2                  | 1.68×10 <sup>-2</sup> | 1.02×10 <sup>-2</sup> | -2.192                                       | -3.61 | 2.47×10 <sup>+5</sup>                     | 2.91×10 <sup>+2</sup>                                  | 1.83×10 <sup>+1</sup> |
| D4                     | 1.18×10 <sup>0</sup>  | 4.90×10 <sup>-1</sup> | -6.685                                       | -7.13 | 5.49×10 <sup>-5</sup>                     | 1.33×10 <sup>-4</sup>                                  | 1.15×10 <sup>-4</sup> |
| D4OH                   | 1.92×10 <sup>-2</sup> | 2.10×10 <sup>-1</sup> | -4.56                                        | -6.44 | 1.07×10 <sup>0</sup>                      | 1.09×10 <sup>0</sup>                                   | 1.31×10 <sup>-3</sup> |
| D4 Formate Ester       | 1.91×10 <sup>-1</sup> | 1.83×10 <sup>-2</sup> | -5.665                                       | -6.67 | 2.40×10 <sup>-3</sup>                     | 8.60×10 <sup>-3</sup>                                  | 8.88×10 <sup>-3</sup> |
| D4OHFormEst            | 7.69×10 <sup>-4</sup> | 4.44×10 <sup>-2</sup> | -3.499                                       | -6.16 | 4.69×10 <sup>+1</sup>                     | 3.13×10 <sup>+2</sup>                                  | 1.18×10 <sup>-2</sup> |
| D4 Hydroperoxide       | 2.24×10 <sup>-2</sup> | 3.50×10 <sup>-1</sup> | -5.886                                       | -7.08 | 5.92×10 <sup>-1</sup>                     | 4.41×10 <sup>-2</sup>                                  | 1.81×10 <sup>-4</sup> |
| D4 Organonitrate       | 1.44×10 <sup>-2</sup> | 5.85×10 <sup>-2</sup> | -7.105                                       | -7.23 | 2.04×10 <sup>-2</sup>                     | 4.14×10 <sup>-3</sup>                                  | 7.65×10 <sup>-4</sup> |
| D4 Ether hydroperoxide | 1.97×10 <sup>-2</sup> | 1.40×10 <sup>-1</sup> | -4.93                                        | -6.54 | 7.19×10 <sup>0</sup>                      | 4.54×10 <sup>-1</sup>                                  | 1.57×10 <sup>-3</sup> |

|                        |                       |                       |        |        |                       |                       |                       |
|------------------------|-----------------------|-----------------------|--------|--------|-----------------------|-----------------------|-----------------------|
| D4 Ether Organonitrate | $1.42 \times 10^{-2}$ | $4.54 \times 10^{-2}$ | -6.149 | -7.02  | $2.48 \times 10^{-1}$ | $3.80 \times 10^{-2}$ | $1.60 \times 10^{-3}$ |
| D4 Form Est 2          | $1.01 \times 10^{-1}$ | $6.78 \times 10^{-3}$ | -4.605 | -6.58  | $1.05 \times 10^{-1}$ | $1.87 \times 10^{-1}$ | $2.95 \times 10^{-2}$ |
| D4OH2                  | $1.24 \times 10^{-3}$ | $5.81 \times 10^{-2}$ | -3.761 | -6.19  | $2.09 \times 10^{+4}$ | $1.06 \times 10^{+2}$ | $8.44 \times 10^{-3}$ |
| D5                     | $2.18 \times 10^{-1}$ | $5.95 \times 10^{-2}$ | -7.417 | -7.61  | $2.37 \times 10^{-5}$ | $1.26 \times 10^{-4}$ | $3.13 \times 10^{-4}$ |
| D5OH                   | $2.49 \times 10^{-3}$ | $2.52 \times 10^{-2}$ | -5.168 | -6.83  | $4.63 \times 10^{-1}$ | $2.07 \times 10^0$    | $4.46 \times 10^{-3}$ |
| D5 Formate Ester       | $3.21 \times 10^{-2}$ | $5.75 \times 10^{-3}$ | -6.273 | -7.31  | $1.04 \times 10^{-3}$ | $1.26 \times 10^{-2}$ | $6.47 \times 10^{-3}$ |
| D5OHFormEst            | $2.39 \times 10^{-3}$ | $9.01 \times 10^{-3}$ | -4.108 | -7.25  | $2.02 \times 10^{+1}$ | $5.65 \times 10^{+2}$ | $4.74 \times 10^{-3}$ |
| D5 Hydroperoxide       | $3.79 \times 10^{-3}$ | $1.00 \times 10^{-1}$ | -6.494 | -7.82  | $2.56 \times 10^{-1}$ | $6.42 \times 10^{-2}$ | $1.15 \times 10^{-4}$ |
| D5 Organonitrate       | $5.23 \times 10^{-3}$ | $7.88 \times 10^{-3}$ | -7.713 | -7.9   | $8.77 \times 10^{-3}$ | $4.95 \times 10^{-3}$ | $1.21 \times 10^{-3}$ |
| D5 Ether hydroperoxide | $5.52 \times 10^{-3}$ | $5.42 \times 10^{-2}$ | -5.538 | -7.091 | $3.12 \times 10^0$    | $6.93 \times 10^{-1}$ | $1.14 \times 10^{-3}$ |
| D5 Ether Organonitrate | $2.30 \times 10^{-3}$ | $6.25 \times 10^{-3}$ | -6.757 | -7.62  | $1.07 \times 10^{-1}$ | $5.79 \times 10^{-2}$ | $2.92 \times 10^{-3}$ |
| D5 Form Est 2          | $3.28 \times 10^{-2}$ | $1.81 \times 10^{-3}$ | -5.213 | -7.32  | $4.52 \times 10^{-2}$ | $2.52 \times 10^{-1}$ | $2.01 \times 10^{-2}$ |
| D5OH2                  | $1.28 \times 10^{-4}$ | $7.89 \times 10^{-3}$ | -4.369 | -6.87  | $9.01 \times 10^{+3}$ | $2.54 \times 10^{+2}$ | $1.30 \times 10^{-2}$ |

## References

- (1) Atkinson, R.; Tuazon, E. C.; Kwok, E. S. C.; Arey, J.; Aschmann, S. M.; Bridier, I. Kinetics and Products of the Gas-Phase Reactions of  $(\text{CH}_3)_4\text{Si}$ ,  $(\text{CH}_3)_3\text{SiCH}_2\text{OH}$ ,  $(\text{CH}_3)_3\text{SiOSi}(\text{CH}_3)_3$  and  $(\text{CD}_3)_3\text{SiOSi}(\text{CD}_3)_3$  with Cl Atoms and OH Radicals. *J. Chem. Soc. Faraday Trans.* **1995**, *91* (18), 3033. <https://doi.org/10.1039/ft9959103033>.
